# Supplementary material for: Ultradispersed Mo/TiO2catalysts for CO2hydrogenation to methanol
Source: Royal Society of Chemistry journal article supplement (doi:10.1039/d1gc01761f), 2021-01-01
Supplement: d1gc01761f1.pdf [file d1gc01761f1.pdf]

## Supporting information

# Ultradispersed Mo/TiO<sub>2</sub> catalysts for CO<sub>2</sub> hydrogenation to methanol

Thomas Len<sup>a</sup>, Mounib Bahri<sup>b</sup>, Ovidiu Ersen<sup>b</sup>, Yaya Lefkir<sup>c</sup>, Luis Cardenas<sup>a</sup>, Ignacio J. Villar-Garcia<sup>d</sup>,  
Virginia Pérez Dieste<sup>d</sup>, Jordi Llorca<sup>e</sup>, Noémie Perret<sup>a</sup>, Ruben Checa<sup>a</sup>, Eric Puzenat,<sup>a</sup> Pavel Afanasiev<sup>a</sup>,  
Franck Morfin<sup>a</sup> and Laurent Piccolo<sup>a\*</sup>

<sup>a</sup> *Univ Lyon, Université Claude Bernard Lyon 1, CNRS, IRCELYON, F-69626 Villeurbanne, France*

<sup>b</sup> *Institut de Physique et Chimie des Matériaux de Strasbourg (IPCMS), UMR 7504, CNRS-Université de Strasbourg, 23 rue du Læss, 67034 Strasbourg Cedex 2, France*

<sup>c</sup> *Laboratoire Hubert Curien, UMR 5516, 42000 Saint-Etienne, France*

<sup>d</sup> *ALBA Synchrotron Light Source, Carrer de la Llum 2-26, 08290 Cerdanyola del Vallès, Barcelona, Spain*

<sup>e</sup> *Institute of Energy Technologies, Department of Chemical Engineering and Barcelona Research Center in Multiscale Science and Engineering, Universitat Politècnica de Catalunya, EEBE, Eduard Maristany 16, 08019 Barcelona, Spain*

\* Corresponding author: laurent.piccolo@ircelyon.univ-lyon1.fr

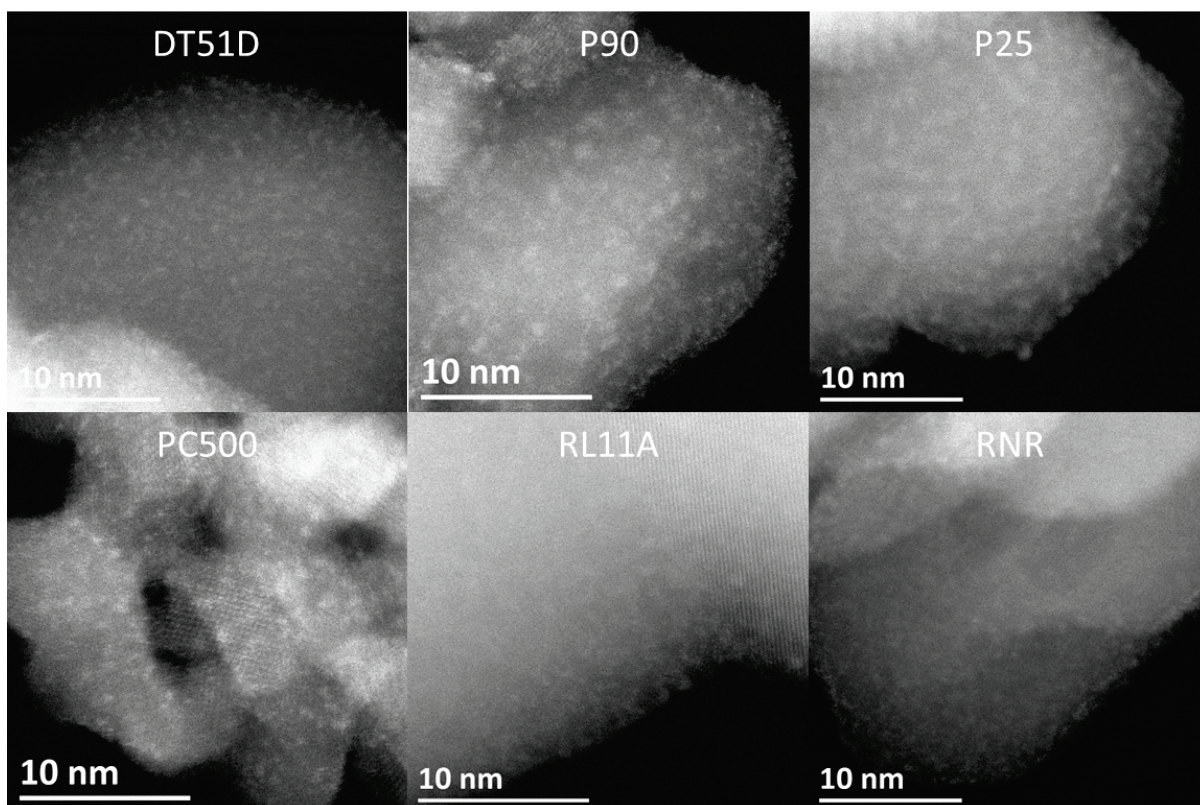

Figure S1 – Representative aberration-corrected STEM-HAADF micrographs of 3 wt% Mo/TiO<sub>2</sub> catalysts.

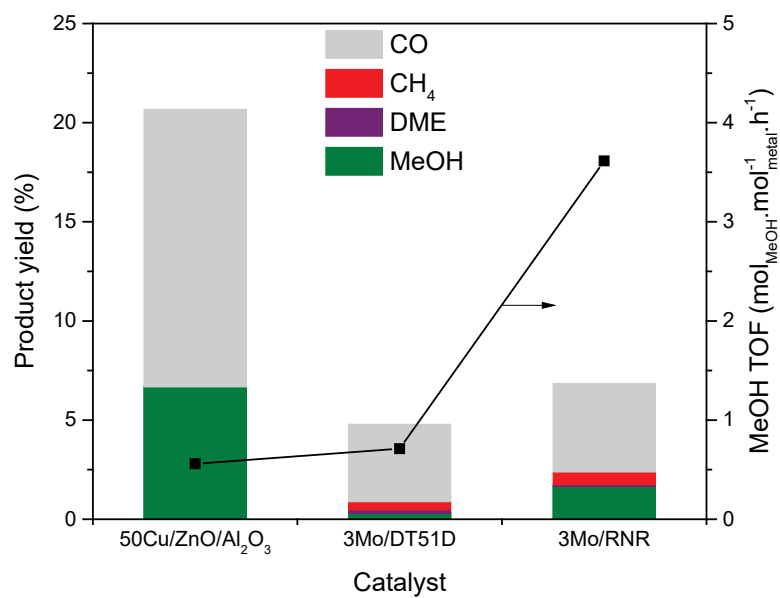

Figure S2 – CO/MeOH/CH<sub>4</sub>/DME yields and methanol TOF per mol of Mo or Cu for the two best 3Mo/TiO<sub>2</sub>-R450 catalysts and the 50 wt% Cu/ZnO/Al<sub>2</sub>O<sub>3</sub> reference at 275 °C under 30 bar of H<sub>2</sub>/CO<sub>2</sub>/N<sub>2</sub> (3/1/1), GHSV = 7500 mL.g<sup>-1</sup>.h<sup>-1</sup>.

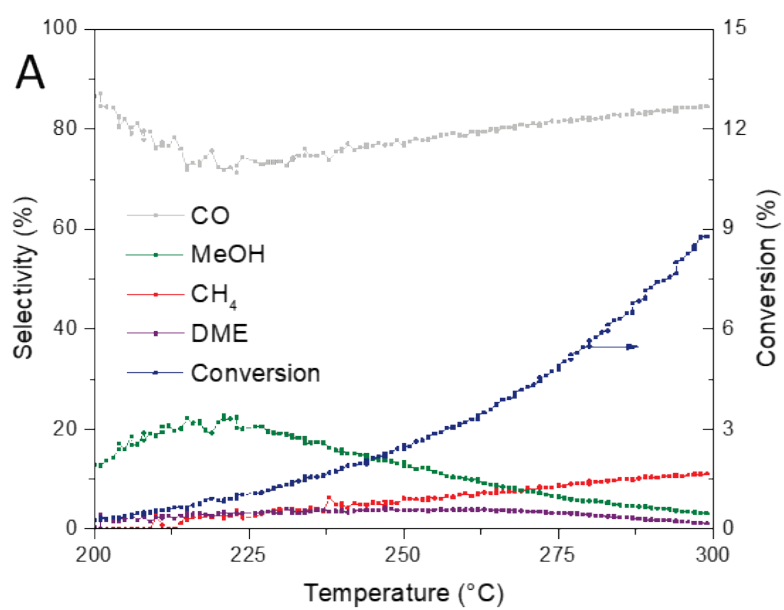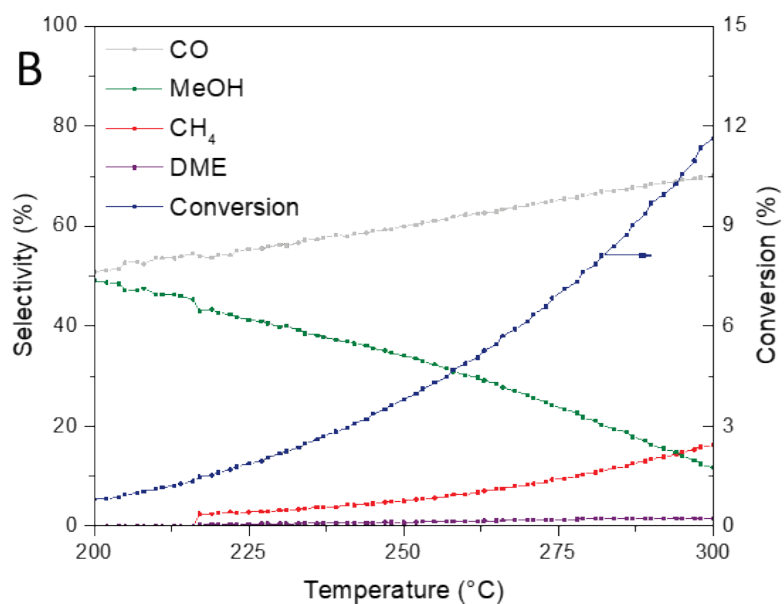

Figure S3 – CO<sub>2</sub> conversion and CO/MeOH/CH<sub>4</sub>/DME selectivities for A: 3Mo/DT51D-R450 and B: 3Mo/RNR-R450 between 200 °C and 300 °C under 30 bar of H<sub>2</sub>/CO<sub>2</sub>/N<sub>2</sub> (3/1/1), GHSV = 7500 mL.g<sup>-1</sup>.h<sup>-1</sup>.

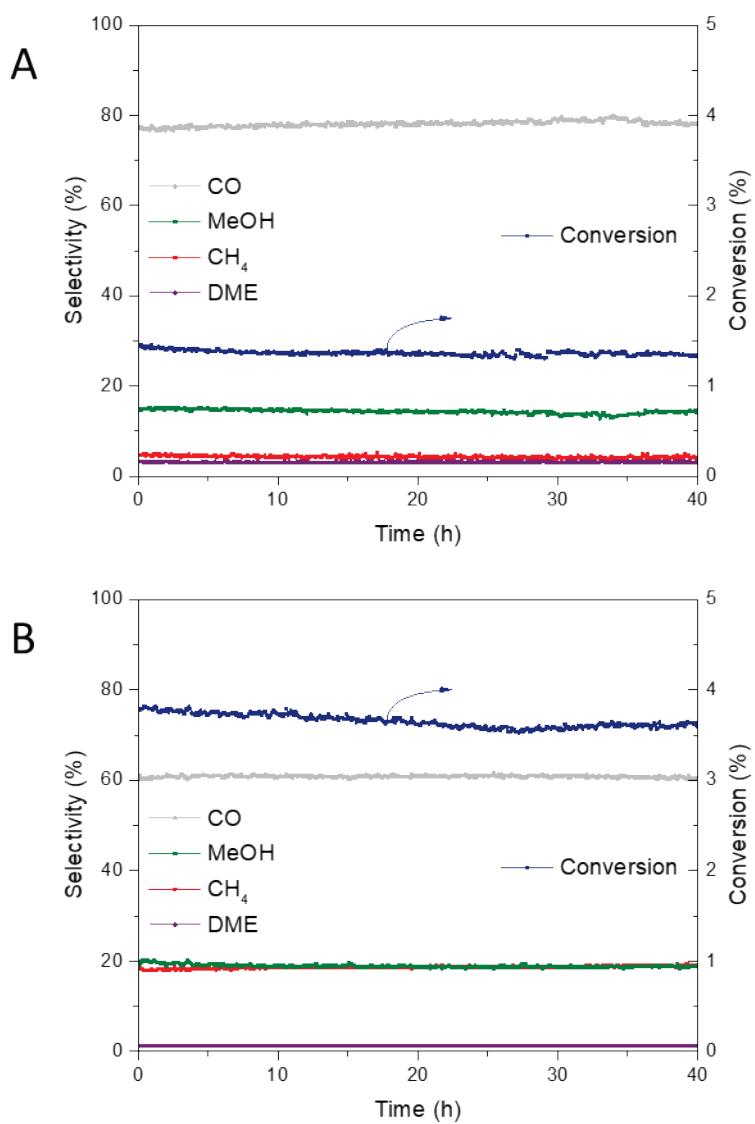

Figure S4 – CO<sub>2</sub> conversion and CO/MeOH/CH<sub>4</sub>/DME selectivities for A: 3Mo/DT51D-R450 and B: 3Mo/RNR-R450 at 250 °C under 30 bar of H<sub>2</sub>/CO<sub>2</sub>/N<sub>2</sub> (3/1/1), GHSV = 7500 mL.g<sup>-1</sup>.h<sup>-1</sup>.

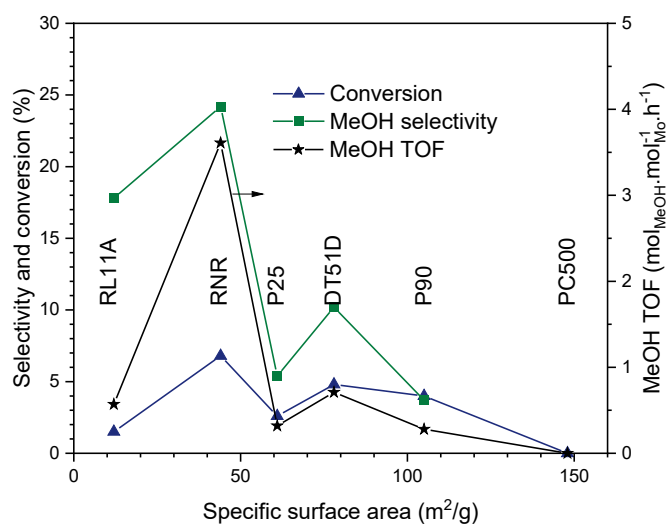

Figure S5 – CO<sub>2</sub> conversion, methanol selectivity, and methanol TOF vs catalysts specific surface area at 275 °C under 30 bar of H<sub>2</sub>/CO<sub>2</sub>/N<sub>2</sub> (3/1/1), GHSV = 7500 mL·g<sup>-1</sup>·h<sup>-1</sup>.

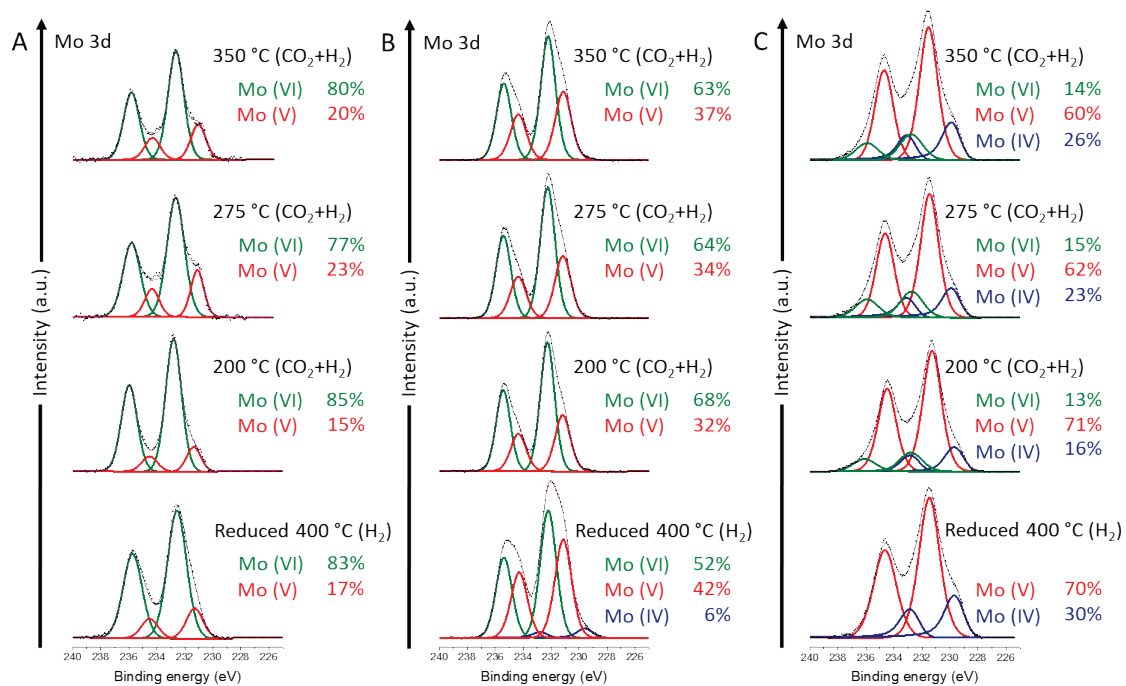

Figure S6 – NAP-XPS analysis of 3 wt% Mo on A: DT51D ; B: P25 ; C: RNR.

Table S1 – Integration parameters of Mo 3d NAP-XPS experiment on 3 wt% Mo on DT51D, P25 and RNR during *in situ* reduction treatment at 400 °C (R400), and exposure to CO<sub>2</sub>/H<sub>2</sub> reactant mixture (3/1) at 200 °C (M200), 275 °C (M275), and 350 °C (M350).

|      |                  | DT51D       |           |                 | P25         |           |                 | RNR         |           |                 |
|------|------------------|-------------|-----------|-----------------|-------------|-----------|-----------------|-------------|-----------|-----------------|
|      |                  | Energy (eV) | FWHM (eV) | % of components | Energy (eV) | FWHM (eV) | % of components | Energy (eV) | FWHM (eV) | % of components |
| R400 | Mo <sup>VI</sup> | 232.6       | 1.6       | 83              | 232.2       | 1.4       | 52              | X           | X         | X               |
|      | Mo <sup>V</sup>  | 231.3       | 1.4       | 17              | 231.2       | 1.4       | 42              | 231.4       | 1.7       | 70              |
|      | Mo <sup>IV</sup> | X           | X         | X               | 229.5       | 1.4       | 6               | 229.6       | 1.5       | 30              |
| M200 | Mo <sup>VI</sup> | 232.8       | 1.4       | 85              | 232.3       | 1.3       | 68              | 232.8       | 1.9       | 13              |
|      | Mo <sup>V</sup>  | 231.4       | 1.2       | 15              | 231.2       | 1.3       | 32              | 231.3       | 1.6       | 71              |
|      | Mo <sup>IV</sup> | X           | X         | X               | X           | X         | X               | 229.6       | 1.5       | 16              |
| M275 | Mo <sup>VI</sup> | 232.6       | 1.5       | 77              | 232.3       | 1.3       | 66              | 232.7       | 1.9       | 15              |
|      | Mo <sup>V</sup>  | 231.2       | 1.1       | 23              | 231.2       | 1.3       | 34              | 231.4       | 1.5       | 62              |
|      | Mo <sup>IV</sup> | X           | X         | X               | X           | X         | X               | 229.8       | 1.4       | 23              |
| M350 | Mo <sup>VI</sup> | 232.6       | 1.4       | 80              | 232.2       | 1.3       | 63              | 232.7       | 1.9       | 14              |
|      | Mo <sup>V</sup>  | 231.2       | 1.2       | 20              | 231.1       | 1.3       | 37              | 231.5       | 1.6       | 60              |
|      | Mo <sup>IV</sup> | X           | X         | X               | X           | X         | X               | 229.8       | 1.9       | 14              |

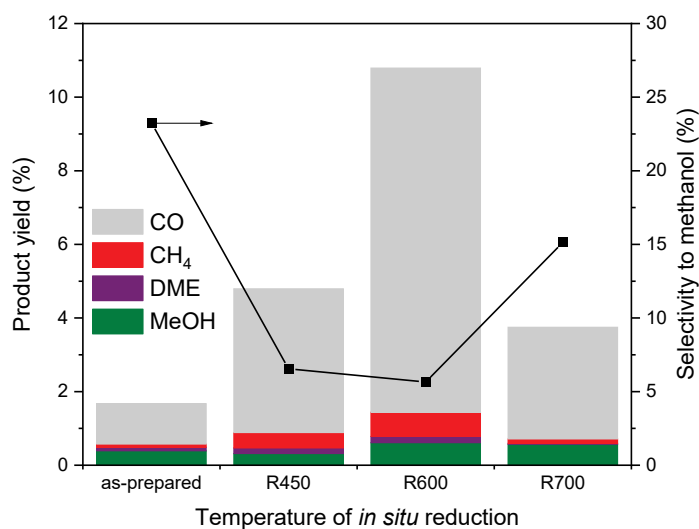

Figure S7 – Effect of *in situ* reduction temperature on CO/MeOH/CH<sub>4</sub>/DME yields and methanol selectivity for 3Mo/DT51D at 275 °C under 30 bar of H<sub>2</sub>/CO<sub>2</sub>/N<sub>2</sub> (3/1/1), GHSV = 7500 mL.g<sup>-1</sup>.h<sup>-1</sup>.

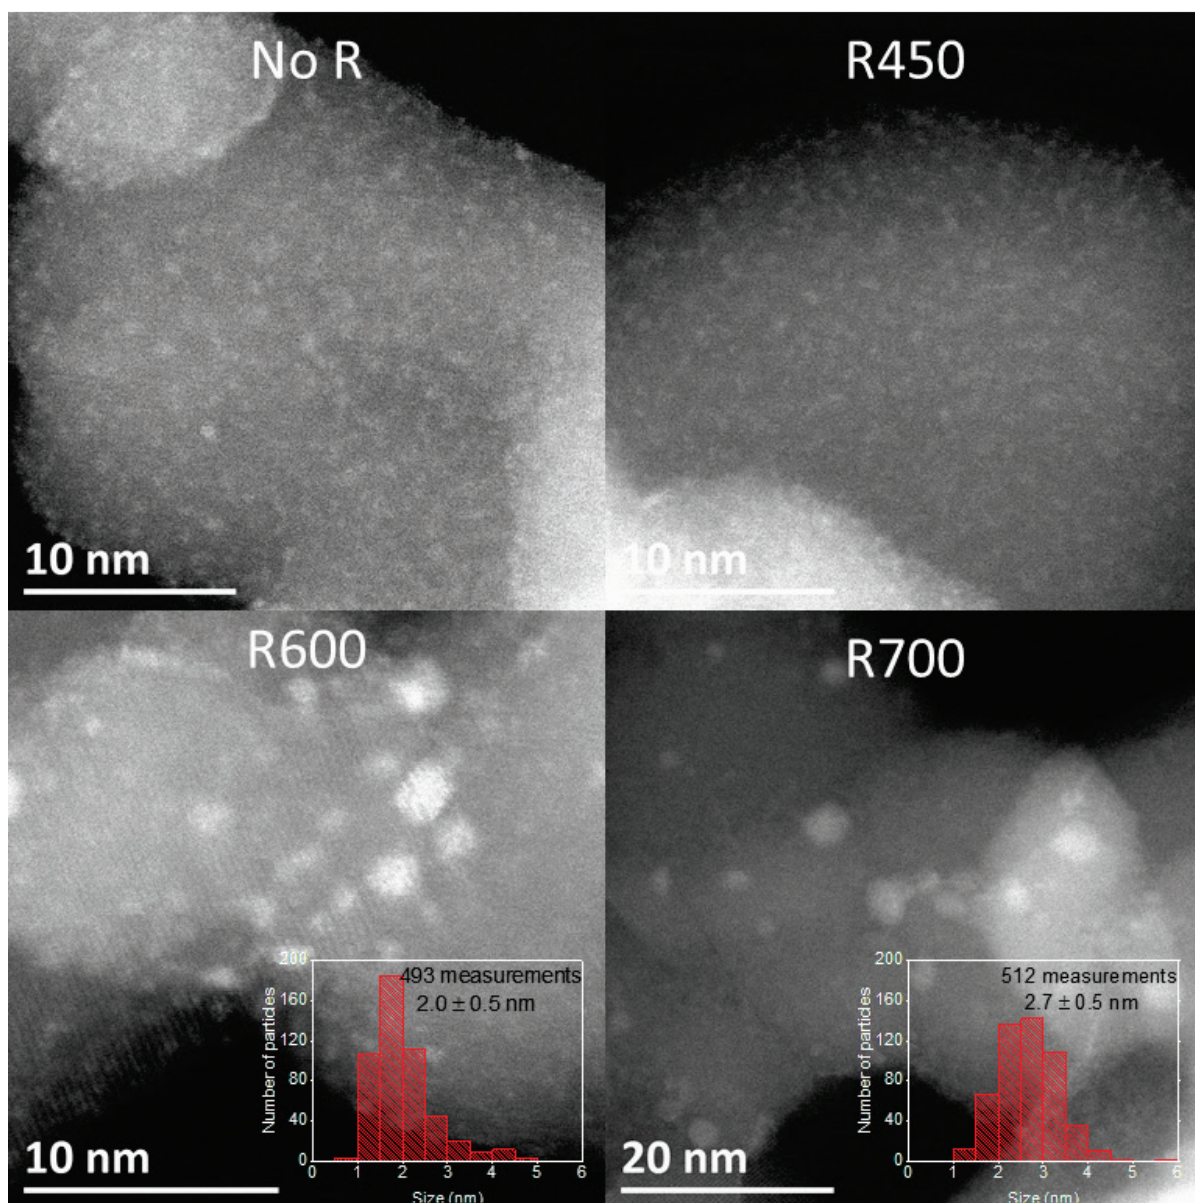

Figure S8 – Representative aberration-corrected STEM-HAADF micrographs of the 3Mo/DT51D catalyst, as-prepared or in situ reduced at different temperatures (450, 600 and 700 °C).

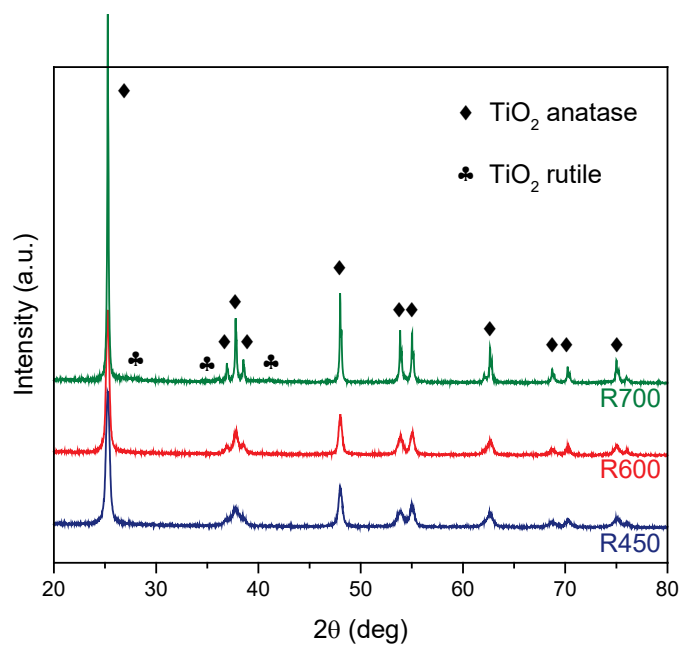

Figure S9 – XRD pattern of 3Mo/DT51D in situ reduced at different temperature. Calculated anatase crystallite sizes are 17, 19 and 46 nm for R450, R600 and R700, respectively.

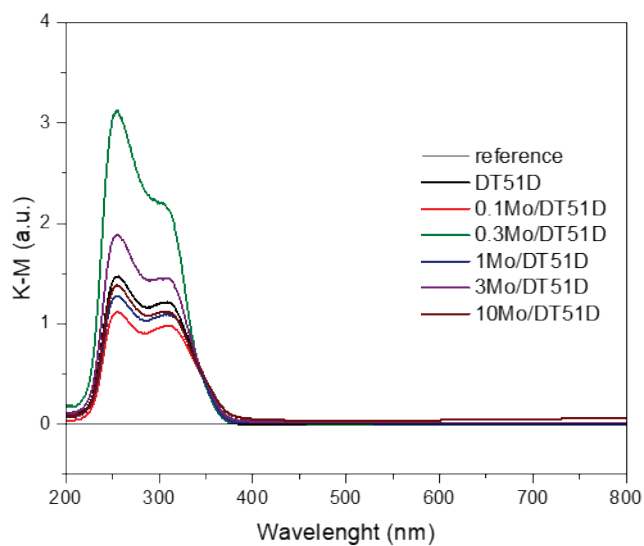

Figure S10 – Diffuse reflectance UV-vis spectra of 0-10 wt% Mo/DT51D samples.



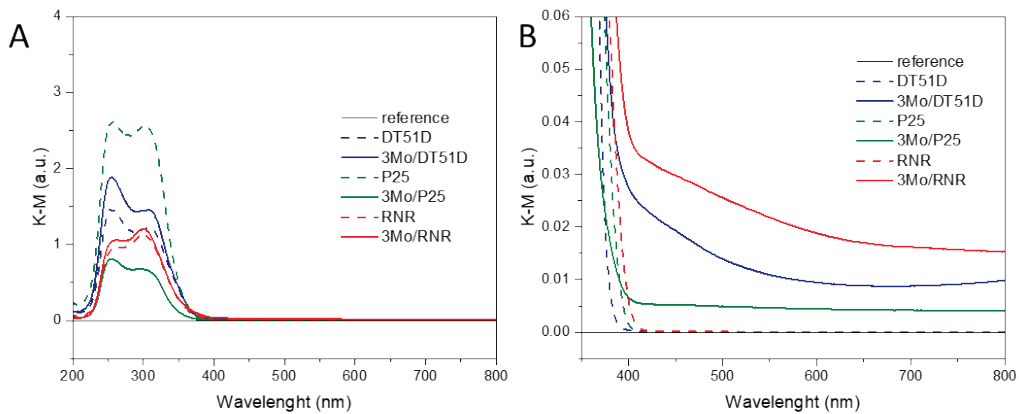

Figure S11 – A: Diffuse reflectance UV-vis spectra of 3Mo/TiO<sub>2</sub> and TiO<sub>2</sub> samples. B: UV-vis Diffuse reflectance spectra zoomed in the 350-800 nm range.

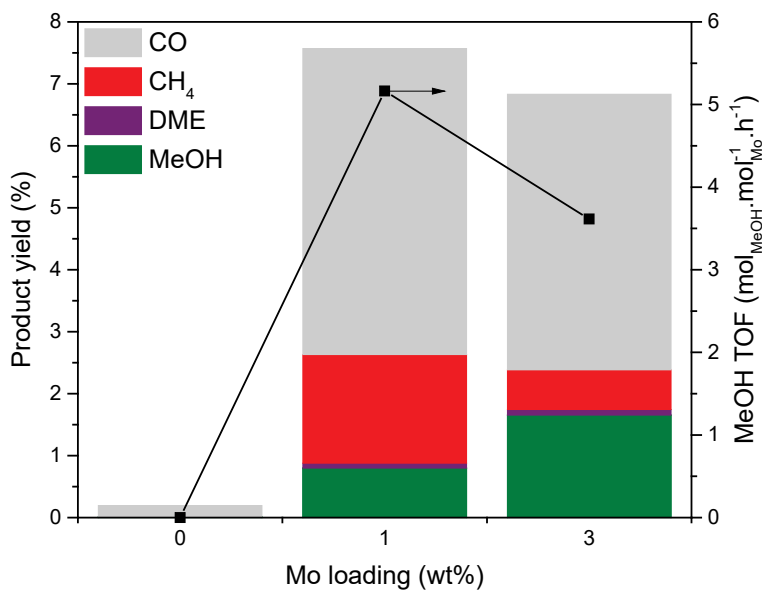

Figure S12 – Effect of Mo loading on CO/MeOH/CH<sub>4</sub>/DME yields and methanol TOF for 0-3 wt% Mo/RNR-R450 at 275 °C under 30 bar of H<sub>2</sub>/CO<sub>2</sub>/N<sub>2</sub> (3/1/1), GHSV = 7500 mL.g<sup>-1</sup>.h<sup>-1</sup>.
